# Supplementary material for: Cytoprotective Roles of a Novel Compound, MHY‐1684, against Hyperglycemia‐Induced Oxidative Stress and Mitochondrial Dysfunction in Human Cardiac Progenitor Cells
Source: Hindawi journal article supplement (doi:10.1155/2018/4528184), 2018-01-01
Supplement: f1 [file 4528184.f1.pdf]

## Supporting Information

**Table S1. ONOO<sup>-</sup> (10μM) scavenging activities of chemical (40μM)**

| Common name | Molecular Formula                                            | Authentic ONOO <sup>-</sup> (%) | ONOO <sup>-</sup> from Decomposition of SIN-1(%) |
|-------------|--------------------------------------------------------------|---------------------------------|--------------------------------------------------|
| MHY-1684    | C <sub>10</sub> H <sub>9</sub> N <sub>2</sub> O <sub>4</sub> | 98.5±0.56                       | 94.75±2.28                                       |
| Pencilamine | C <sub>5</sub> H <sub>11</sub> NO <sub>2</sub> S             | 93.83±0.83                      | 92.88±0.21                                       |
| Resveratrol | C <sub>14</sub> H <sub>12</sub> O <sub>3</sub>               | 18.03±1.20                      | 36.80±16.44                                      |

Data are mean ± for triplicate measurements.
